# Supplementary material
Source: publisher site journal article supplement (http://static.cambridge.org/content/id/urn:cambridge.org:id:article:S0899823X20000215/resource/name/S0899823X20000215supp001.docx)
Supplement: Supplementary file 1 [file S0899823X20000215supp001.docx]

**Supplementary Materials.**

**Supplementary Table 1. Norovirus Case Definitions**

| **Suspected norovirus case** | Any patient fitting one of the following::  1) afebrile (T<100.4) with either a single episode of unexplained vomiting (with or without diarrhea), or new onset diarrhea plus nausea;  2) febrile (T≥100.4) *plus*any new gastrointestinal (GI) complaint (nausea, vomiting, abdominal pain, diarrhea) for <24 hours; *or*  3) known community or hospital exposure with any gastrointestinal complaint. |
| --- | --- |
| **Presumptive norovirus case** | Any patient with persistent GI illness when testing was not obtained or available. This included patients who were:  1) afebrile (T<100.4) PLUS either >1 episode of vomiting without an alternative explanation, or diarrhea plus nausea persisting for ≥24 hours, *or*  2) febrile (T≥100.4) *plus* vomiting or diarrhea for ≥24 hours without an alternative explanation. |
| **Confirmed norovirus case** | Any patient with presumptive norovirus infection PLUS positive testing (enzyme immunoassay [EIA] during the study period) and the absence of other GI infections (*e.g.,* *Clostridioides difficile*, cytomegalovirus, adenovirus) that could explain the symptoms. |

**SupplementaryTable 2. Clinical and Demographic Characteristics of Hematopoeitic Stem Cell Transplant (HSCT) Patients with Positive Norovirus Enzyme Immunoassay**

| Patient | | Sex | Age | Primary Disease | HSCT at time of Diagnosis | Neutropenia at admission | Immunosuppressive Medications at the time of Diagnosis | Outcome |
| --- | --- | --- | --- | --- | --- | --- | --- | --- |
| 1 | M | | 57 | AML | Allogeneic transplant Chronic GVHD | No | Prednisone Budesonide | Home |
| 2 | M | | 70 | Burkitt’s Lymphoma | No | Yes  (ANC3 80) | Prednisone | ICU4 |
| 3 | F | | 59 | Myelodysplastic Syndrome | No | No | Dexamethasone Decitabine Lenalidomide | Rehab |
| 4 | F | | 72 | Multiple Myeloma | Autologous transplant | No | Melphalan Dexamethasone | ICU, Death |
| 5 | M | | 54 | DLBCL1 | No | No | Methotrexate Dexamethasone Rituximab Ifosfamide Carboplatin Etoposide | Home |
| 6 | M | | 65 | DLBCL1 | Autologous transplant | No | Carmustine Etoposide Cytarabine Melphalan | Home |
| 7 | F | | 40 | APML2 | No | Yes  (ANC 96) | Tretinoin Cytarabine Daunorubicin Dexamethasone | Home |

1 Diffuse large B-cell lymphoma

2 Acute promyelocytic leukemia

3 Absolute neutrophil count, in cells/mm3

4 Intensive care unit

**Supplementary Figure 1. Floor Plan of the HSCT Unit and Location of Norovirus Cases**
